# Supplementary material
Source: Springer Nature journal article supplement (https://www.springermedizin.de/resource/supplementary/12883_2013_962_MOESM5_ESM.pdf/9456522)

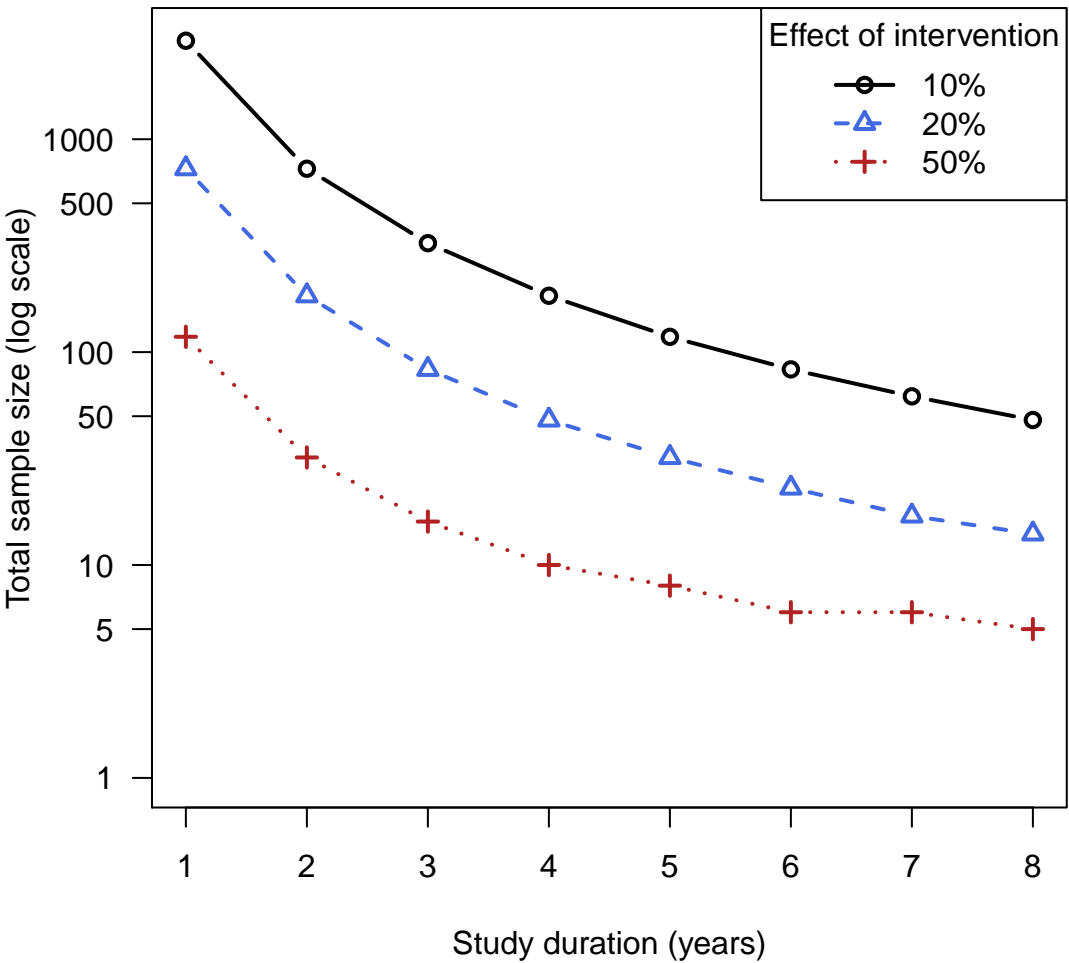

Supplement: MOESM5 [file 9456522]
